# Supplementary material for: 100 Important Questions about Bitcoin’s Energy Use and ESG Impacts
Source: MDPI journal article supplement (doi:10.3390/challe14010001), 2022-12-20
Supplement: s1 [file s1]

## Contents

|                                                                                                                                                      |       |
|------------------------------------------------------------------------------------------------------------------------------------------------------|-------|
| Interview keywords and phrases .....                                                                                                                 | S1-4  |
| Table S1 – Sources from which questions were drawn.....                                                                                              | S1-2  |
| Table S2 – Comparison of top 50 keywords from all ( $n=747$ ) and selected ( $n=68$ ) transcriptions (green are keywords common to both lists) ..... | S1-8  |
| Figure S1 – Top 20 keywords in $n=68$ interviews (% of total keywords in transcripts).....                                                           | S1-6  |
| Figure S2 – Top 20 keywords in all $n=747$ interviews (% of total keywords in transcripts).....                                                      | S1-7  |
| Figure S3 – Cluster analysis of keywords for the $n=68$ selected interviews .....                                                                    | S1-10 |
| Figure S4 – Cluster analysis of keywords for all $n=747$ interviews.....                                                                             | S1-11 |

## Supplementary Materials

| Doc | Podcast/source                       | Date       | Title                                                                                             | Interviewees/speakers                                    | Duration (min) |
|-----|--------------------------------------|------------|---------------------------------------------------------------------------------------------------|----------------------------------------------------------|----------------|
| 1   | The Anita Posch Show                 | 2022-06-09 | <a href="#">Unleashing Bitcoin's Full Potential</a>                                               | Carel van Wyk                                            | 93             |
| 2   | Bitcoin Archive with Archie          | 2022-06-27 | <a href="#">Bitcoin is Good For The Environment</a>                                               | Daniel Batton                                            | 69             |
| 3   | Bitcoin Archive with Archie          | 2022-07-18 | <a href="#">Bitcoin is Good For The Environment - Part 2</a>                                      | Daniel Batton                                            | 67             |
| 4   | Blue Collar Bitcoin                  | 2022-05-06 | <a href="#">Bitcoin and Renewable Energy</a>                                                      | Magdalena Gronowska                                      | 80             |
| 5   | Bitcoin Standard Podcast             | 2021-10-13 | <a href="#">Hard money and time preference: lecture at the Property &amp; Freedom Society</a>     | Saifedean Ammous                                         | 40             |
| 6   | Bitcoin Fundamentals                 | 2021-02-23 | <a href="#">Bitcoin Mining And Energy</a>                                                         | Marty Bent, Harry Sudock                                 | 67             |
| 7   | Bitcoin Fundamentals                 | 2021-04-28 | <a href="#">Bitcoin's International Impact</a>                                                    | Alex Gladstein                                           | 78             |
| 8   | Bitcoin Fundamentals                 | 2021-06-09 | <a href="#">Jack Dorsey's Involvement In Bitcoin &amp; Jack Maller's El Salvador Announcement</a> | Alex Gladstein                                           | 63             |
| 9   | Bitcoin Fundamentals                 | 2021-08-11 | <a href="#">Bitcoin Legislature, Regulation, &amp; Legal</a>                                      | Jason Brett, Joe Carlsare                                | 86             |
| 10  | Bitcoin Fundamentals                 | 2021-12-14 | <a href="#">Bitcoin Fear, Uncertainty, and Doubt (FUD)</a>                                        | Dan Held                                                 | 54             |
| 11  | Bitcoin Fundamentals                 | 2022-03-08 | <a href="#">Bitcoin exchange and mining policy incentives</a>                                     | Magdalena Gronowska                                      | 47             |
| 12  | Bitcoin Fundamentals                 | 2022-03-30 | <a href="#">How fiat blinds Bitcoin's importance</a>                                              | Alex Gladstein                                           | 78             |
| 13  | Bitcoin Fundamentals                 | 2022-04-12 | <a href="#">Bitcoin policy considerations</a>                                                     | Jason Brett                                              | 63             |
| 14  | Bitcoin Fundamentals                 | 2022-05-24 | <a href="#">The Bitcoin energy revolution</a>                                                     | Shaun O'Connell                                          | 66             |
| 15  | Bitcoin Fundamentals                 | 2022-06-07 | <a href="#">Bitcoin legal tender and international adoption</a>                                   | Mike Peterson                                            | 59             |
| 16  | Bitcoin Fundamentals                 | 2022-08-23 | <a href="#">Bitcoin energy and custody</a>                                                        | Parker Lewis, Will Cole                                  | 51             |
| 17  | Coin Stories                         | 2022-06-23 | <a href="#">Bitcoin Price Drop, Africa, Stable Coins and Michael Jordan</a>                       | Fodé Diop                                                | 54             |
| 18  | Closing the Loop                     | 2022-07-20 | <a href="#">All in on the mission to bring more freedom to Africa</a>                             | Bernard Parah                                            | 108            |
| 19  | Closing the Loop                     | 2022-06-08 | <a href="#">Wild mining' and bringing the market to the molecule</a>                              | Bob Burnett                                              | 137            |
| 20  | Closing the Loop                     | 2021-08-09 | <a href="#">Bitcoin mining at GRID, the evolution of energy production, and human flourishing</a> | Harry Sudock                                             | 93             |
| 21  | Galaxy Brains                        | 2022-08-05 | <a href="#">Bitcoin activism</a>                                                                  | Alex Gladstein                                           | 71             |
| 22  | Lex Fridman Podcast                  | 2021-10-16 | <a href="#">Bitcoin, Authoritarianism, and Human Rights</a>                                       | Alex Gladstein                                           | 154            |
| 23  | The Money Movement                   | 2021-01-21 | <a href="#">Black Empowerment With Crypto</a>                                                     | Cleve Mesidor                                            | 46             |
| 24  | The Money Movement                   | 2021-03-31 | <a href="#">The Crypto and Carbon Emissions Debate</a>                                            | Nic Carter, Meltem Demirors                              | 60             |
| 25  | On the Brink                         | 2020-12-07 | <a href="#">The industrial Bitcoin miner perspective</a>                                          | Mustafa Yiham                                            | 47             |
| 26  | On the Brink                         | 2022-03-14 | <a href="#">(The Blind Spot) on Reconsidering Bitcoin Skepticism</a>                              | Izabella Kaminska                                        | 92             |
| 27  | On the Brink                         | 2022-03-30 | <a href="#">Separating Fact from Fiction in Bitcoin Mining</a>                                    | Ben Gagnon                                               | 54             |
| 28  | On the Brink                         | 2022-05-02 | <a href="#">Building a Zero Carbon Bitcoin Miner</a>                                              | Paul Prager                                              | 46             |
| 29  | On the Brink                         | 2022-06-27 | <a href="#">How Grids can Accommodate Bitcoin Mining</a>                                          | Blake King                                               | 54             |
| 30  | Real Vision                          | 2022-07-12 | <a href="#">Why the quest for sustainable Bitcoin can enrich everyone</a>                         | Brad Van Voorhees, Max Song                              | 48             |
| 31  | Real Vision                          | 2022-06-21 | <a href="#">Bitcoin mining in the age of volatility</a>                                           | JohnPaul Baric                                           | 32             |
| 32  | Sustainable Blockchain Summit @ SXSW | 2022-03-15 | <a href="#">Incentivizing Collective Climate Action</a>                                           | Alex de Vries, Michael Casey, Adam Wideman, Stephen Haft | 44             |

## Supplementary Materials

|    |                                              |            |                                                                         |                                                   |             |
|----|----------------------------------------------|------------|-------------------------------------------------------------------------|---------------------------------------------------|-------------|
| 33 | Sustainable Blockchain Summit EU, Paris 2022 | 2022-07-22 | <a href="#">Unlocking the next wave of institutional Bitcoin</a>        | Brad Van Voorhees                                 | 24          |
| 34 | Smart People Shit                            | 2022-02-01 | <a href="#">Bitcoin is a Pioneer Species</a>                            | Brandon Quittem                                   | 120         |
| 35 | The Bitcoin Source                           | 2022-07-07 | <a href="#">Progressive Health and Bitcoin</a>                          | Mark Stephanie                                    | 43          |
| 36 | The Bitcoin Source                           | 2022-08-24 | <a href="#">Bitcoin's Climate Prodigy</a>                               | Margot Paez                                       | 37          |
| 37 | The Compass Podcast                          | 2022-02-10 | <a href="#">Renewable Mining in Australia</a>                           | Daniel Roberts                                    | 31          |
| 38 | The Compass Podcast                          | 2022-04-14 | <a href="#">The Energy Problem Texas Isn't Talking About</a>            | Blake King                                        | 47          |
| 39 | The Compass Podcast                          | 2022-04-28 | <a href="#">Turning Ocean Thermal to Hashrate</a>                       | Nate Harmon                                       | 50          |
| 40 | What Bitcoin Did                             | 2019-05-21 | <a href="#">A Bitcoin Reality Check in Venezuela</a>                    | Jill Carlson, Jamaal Montasser, Alejandro Machado | 97          |
| 41 | What Bitcoin Did                             | 2019-07-08 | <a href="#">The Bitcoin Electricity Consumption Index</a>               | Michel Rauchs                                     | 58          |
| 42 | What Bitcoin Did                             | 2020-02-29 | <a href="#">Beginner's Guide #15: Bitcoin FUD</a>                       | Nic Carter                                        | 71          |
| 43 | What Bitcoin Did                             | 2020-03-03 | <a href="#">Bitcoin World #8: Bitcoin in Zimbabwe</a>                   | Anita Posch                                       | 67          |
| 44 | What Bitcoin Did                             | 2020-06-03 | <a href="#">Bitcoin &amp; Black America</a>                             | Isiah Jackson                                     | 64          |
| 45 | What Bitcoin Did                             | 2020-09-29 | <a href="#">Bitcoin: A Novel Economic Institution</a>                   | Yassine Elmandjra                                 | 70          |
| 46 | What Bitcoin Did                             | 2021-06-09 | <a href="#">Gradually then Suddenly Pt 1 - Killing the FUD</a>          | Parker Lewis                                      | 128         |
| 47 | What Bitcoin Did                             | 2021-06-16 | <a href="#">The Truth About Bitcoin's Energy</a>                        | Harry Sudock                                      | 90          |
| 48 | What Bitcoin Did                             | 2021-07-09 | <a href="#">Gradually then Suddenly Pt 2 - Bitcoin First Principles</a> | Parker Lewis                                      | 102         |
| 49 | What Bitcoin Did                             | 2021-09-16 | <a href="#">ESG &amp; Institutional Bitcoin Investment</a>              | Kevin O'Leary                                     | 61          |
| 50 | What Bitcoin Did                             | 2022-01-21 | <a href="#">Bitcoin: A View From The Left</a>                           | Ben Arc                                           | 96          |
| 51 | What Bitcoin Did                             | 2022-02-17 | <a href="#">Can Bitcoin Mining Save the Environment?</a>                | Troy Cross                                        | 62          |
| 52 | What Bitcoin Did                             | 2022-03-21 | <a href="#">A Progressive View of Bitcoin</a>                           | Margot Paez                                       | 138         |
| 53 | What Bitcoin Did                             | 2022-03-28 | <a href="#">Bitcoin's Clean Energy Revolution</a>                       | Nic Carter, Troy Cross                            | 104         |
| 54 | What Bitcoin Did                             | 2022-04-18 | <a href="#">Freedom Technologies &amp; Civil Disobedience</a>           | Austin Hill                                       | 90          |
| 55 | What Bitcoin Did                             | 2022-04-22 | <a href="#">Bitcoin Energy Markets</a>                                  | Shaun O'Connell                                   | 118         |
| 56 | What Bitcoin Did                             | 2022-04-25 | <a href="#">Is There a Moral Case for Fossil Fuels?</a>                 | Alex Epstein                                      | 131         |
| 57 | What Bitcoin Did                             | 2022-05-23 | <a href="#">The Bitcoin Awakening</a>                                   | John Vallis                                       | 93          |
| 58 | What Bitcoin Did                             | 2022-06-17 | <a href="#">Bitcoin is a Black Hole</a>                                 | Harry Sudock                                      | 67          |
| 59 | What Bitcoin Did                             | 2022-06-24 | <a href="#">Bitcoin Privacy</a>                                         | Matt Odell                                        | 98          |
| 60 | What Bitcoin Did                             | 2022-06-27 | <a href="#">Inflation's Hidden Cost</a>                                 | Avik Roy                                          | 97          |
| 61 | What Bitcoin Did                             | 2022-07-04 | <a href="#">Bitcoin Behind the Veil</a>                                 | Craig Warmke                                      | 99          |
| 62 | What Bitcoin Did                             | 2022-07-06 | <a href="#">The Moral Case for Renewable Energy</a>                     | Andrew Dessler                                    | 123         |
| 63 | What Bitcoin Did                             | 2022-07-08 | <a href="#">Orange Pilling the White House</a>                          | David Zell                                        | 93          |
| 64 | What Bitcoin Did                             | 2022-07-13 | <a href="#">Turning Garbage into Bitcoin</a>                            | Adam Wright                                       | 71          |
| 65 | What Bitcoin Did                             | 2022-07-15 | <a href="#">Bitcoin Conviction</a>                                      | Eric Weiss                                        | 62          |
| 66 | What Bitcoin Did                             | 2022-07-20 | <a href="#">The Role of Bitcoin Maximalism</a>                          | Udi Wertheimer                                    | 97          |
| 67 | What Bitcoin Did                             | 2022-07-22 | <a href="#">Is ESG Signalling Civilisational Decline?</a>               | Jeet Sidhu                                        | 201         |
| 68 | What Bitcoin Did                             | 2022-08-10 | <a href="#">A Progressive's Case for Bitcoin</a>                        | Jason Maier                                       | 100         |
|    |                                              |            |                                                                         |                                                   | <b>5301</b> |

Table S1 – Sources from which questions were drawn

## Interview keywords and phrases

Information in Supplementary Materials 1 provides some additional detail about word and phrase frequency and relationship for the  $n=68$  selected interviews, and contrasts those findings with all  $n=747$  transcriptions.

I used all  $n=747$  interviews to manually construct the dictionary and help identify specific interviews that contained relevant keywords or phrases. The dictionary was created in the WordStat (v 7.1.15) sub-program of the QDA software platform (v 5.0.011) and Wordstat results were used to create the charts below. In this analysis, ‘keywords’ are combinations individual words and/or phrases (2-6 words). Because I used the dictionary as a heuristic to personally identify potentially relevant papers for in-depth, manual review, I did not streamline the dictionary and eliminate all keyword redundancies.

The dictionary was used on each group of interview transcripts to highlight differences between the language used by interviewees in the selected interviews and that used in the broader Bitcoin podcast space. While this information cannot be used to prioritize the importance of individual research questions, it does provide some insight into the relative level of focus on particular topics among the podcasts/broadcasts.

Figure S1 shows the 20 keywords with the highest frequency in the  $n=68$  transcriptions. The ‘keywords’ (themes) included the following individual words and phrases:

- **Energy used – general:** electricity, energy
- **Renewable energy:** geothermal, hydroelectric, renewable, renewables, solar, wind
- **Bitcoin mining:** ASICS, mining, rigs
- **Energy grid:** energy companies, energy demand, energy infrastructure, energy markets, energy mix, energy prices, energy producer, energy producers, energy production, ERCOT, flexible load, grid, power generation, power plant, power plants power prices.
- **Climate change:** atmosphere, climate, hockey stick, ice age, ice ages, ice caps, ocean, oceans, planet, polar bears, sea level, temperature, warming
- **Carbon emissions:** burning, carbon, combustion, emissions, fuel, fuels
- **Economics – general:** consumption, cost-benefit, cost effective, demand, demand and supply, demand response, economic benefit, economics, economist, economists, efficient market hypothesis, marginal cost, neoclassical, profit, profit margins, profitable, revenue, supply, supply and demand, valuation
- **Bitcoin miners:** block producer, miner, miners
- **Governance – general:** governance, government, governments, monopoly on violence
- **Block production:** Bitcoin core, Bitcoin core node, Bitcoin improvement proposal, Bitcoin infrastructure, block height, block propagation, block reward, block rewards, block size, block sizes, block space, block subsidy, block weight, blocks, Byzantine generals’ problem, consensus, consensus rule, difficulty adjustment, hash, hashing, hashrate, node, nodes
- **Regulation:** compliance, enforcement, legislation, police, regulate, regulated, regulation, regulations, regulator, regulators, regulatory
- **ESG:** environmentally friendly, ESG, green, precautionary, sustainability, sustainable
- **Nonrenewable energy:** coal, hydrocarbons, natural gas, oil
- **Democratic principles:** checks and balances, constitution, democracy, democratic society, democratically elected, election, founding fathers, free choice, free society, free speech, freedom

of speech, freedoms, property rights, rights, rule of law, separation of money and state, vote, voting, voting rights

- **Risk – general:** bank runs, bubble, contagion, counterparty, currency crisis, debt crisis, debt spiral, economic crisis, economic shock, risk, risks, threat, vulnerable
- **Transparency:** accountability, accountable, legitimate, transparency, transparent, trust, trusted, trusting, truth
- **Narratives – general:** cognitive dissonance, ideological, ideology, mental model, narrative, narratives, stories, story
- **Political system:** elected, election cycle, election cycles, jurisdiction, political, politicians, politics

By contrast, Figure S2 shows the 20 themes with the highest total words/phrases contained within the same paragraph for all  $n=747$  transcriptions. The distribution of the top keywords is relatively uniform, and there was some overlap with the  $n=68$  selected interviews. The broader discourse had more focus on general technical issues, financial markets, and politics compared to the select interviews (details regarding the inclusion of particular words and phrases are not given for all keywords – please contact the author for details).

Table S2 expands on charts 1 and 2, showing the ordering of the top 50 keywords for each of the total and selected transcriptions, and highlighting commonalities and differences in keywords between the full set of interviews and those selected for identifying specific energy and ESG issues.

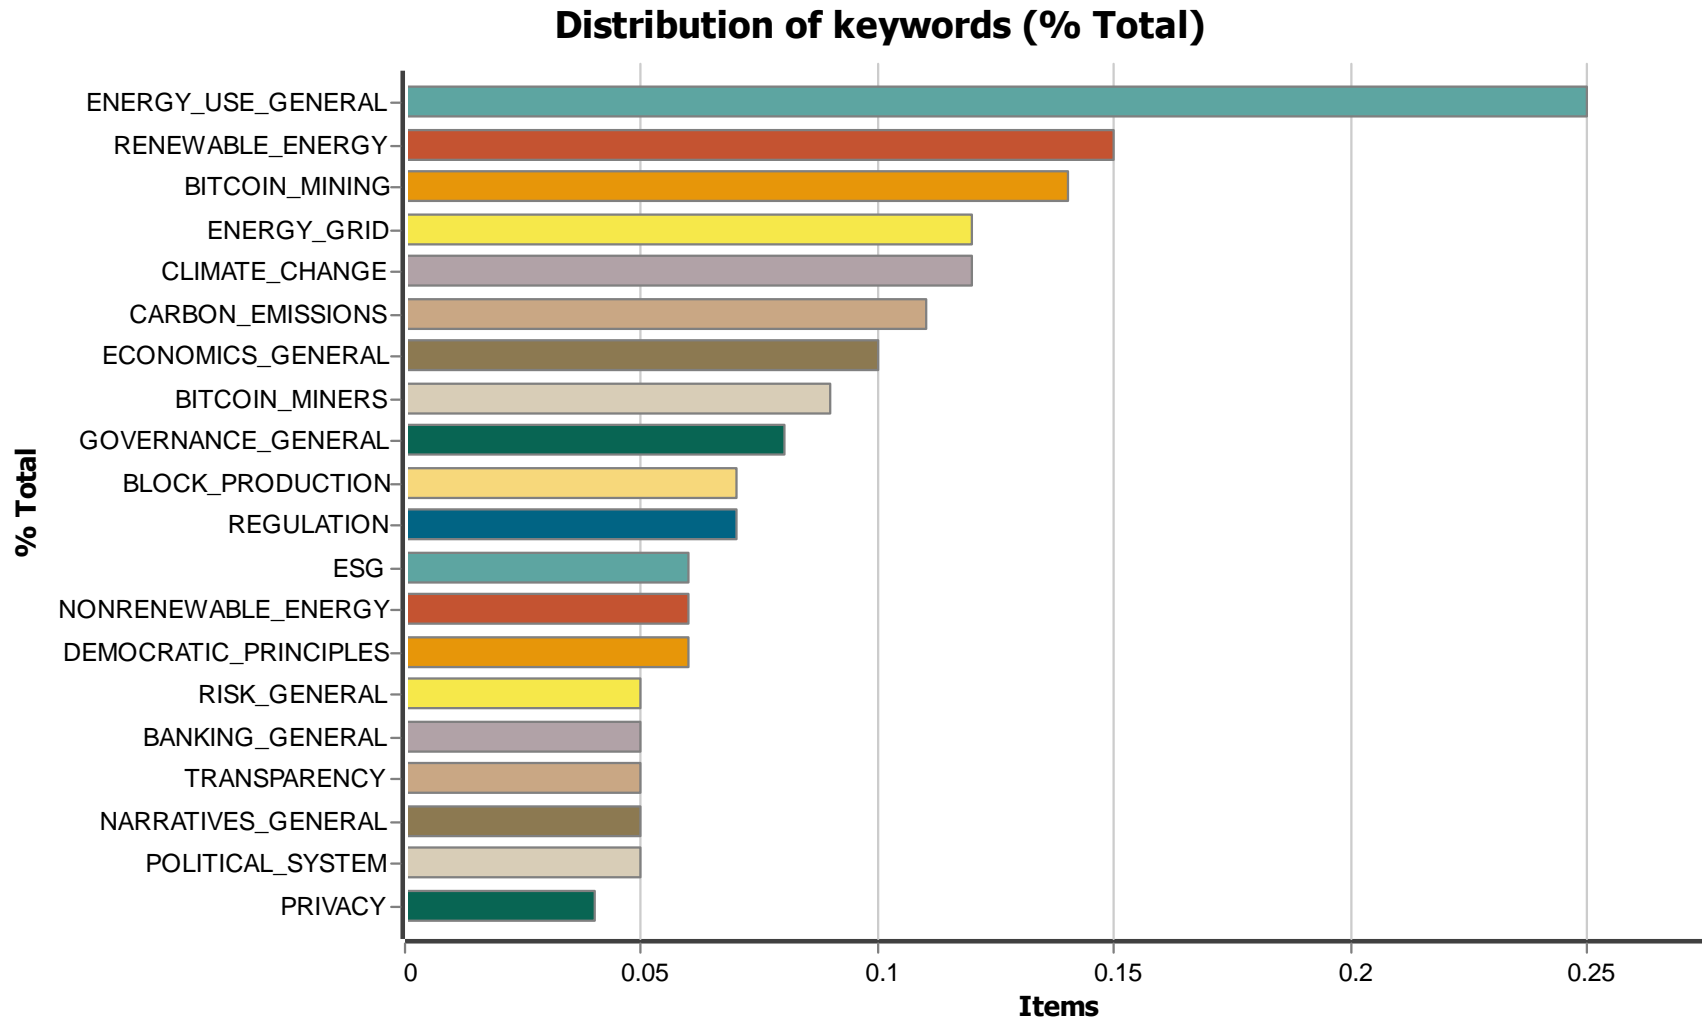

Figure S1 – Top 20 keywords in n=68 interviews (% of total keywords in transcripts)

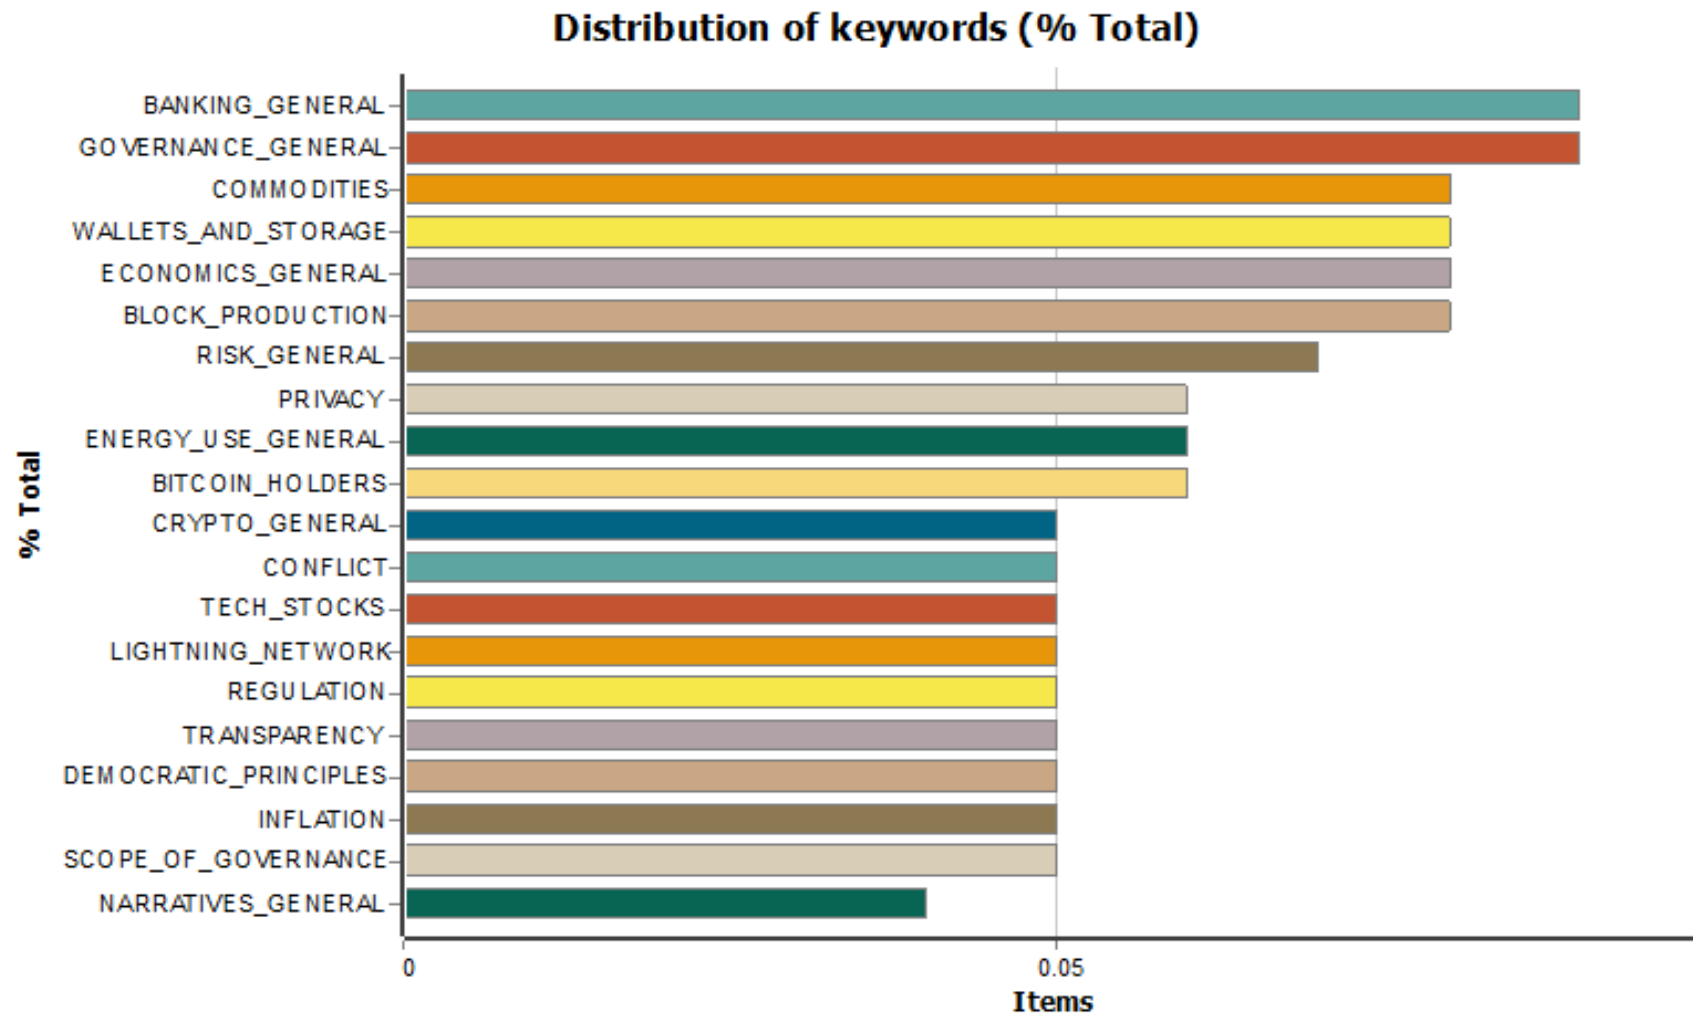

Figure S2 – Top 20 keywords in all n=747 interviews (% of total keywords in transcripts)

## Supplementary Materials

Table S2 – Comparison of top 50 keywords from all (n=747) and selected (n=68) transcriptions (green are keywords common to both lists)

| All interviews (n =747)  |           |         | Selected interviews (n =68) |           |         |
|--------------------------|-----------|---------|-----------------------------|-----------|---------|
|                          | FREQUENCY | % TOTAL |                             | FREQUENCY | % TOTAL |
| BANKING_GENERAL          | 8128      | 0.09%   | ENERGY_USE_GENERAL          | 1959      | 0.25%   |
| GOVERNANCE_GENERAL       | 7944      | 0.09%   | RENEWABLE_ENERGY            | 1124      | 0.15%   |
| COMMODITIES              | 6994      | 0.08%   | BITCOIN_MINING              | 1098      | 0.14%   |
| WALLETS_AND_STORAGE      | 6857      | 0.08%   | ENERGY_GRID                 | 961       | 0.12%   |
| ECONOMICS_GENERAL        | 6684      | 0.08%   | CLIMATE_CHANGE              | 954       | 0.12%   |
| BLOCK_PRODUCTION         | 6647      | 0.08%   | CARBON_EMISSIONS            | 879       | 0.11%   |
| RISK_GENERAL             | 5827      | 0.07%   | ECONOMICS_GENERAL           | 805       | 0.10%   |
| PRIVACY                  | 5560      | 0.06%   | BITCOIN_MINERS              | 710       | 0.09%   |
| ENERGY_USE_GENERAL       | 5157      | 0.06%   | GOVERNANCE_GENERAL          | 621       | 0.08%   |
| BITCOIN_HOLDERS          | 4845      | 0.06%   | BLOCK_PRODUCTION            | 575       | 0.07%   |
| CRYPTO_GENERAL           | 4680      | 0.05%   | REGULATION                  | 547       | 0.07%   |
| CONFLICT                 | 4665      | 0.05%   | ESG                         | 483       | 0.06%   |
| TECH_STOCKS              | 4326      | 0.05%   | NONRENEWABLE_ENERGY         | 466       | 0.06%   |
| LIGHTNING_NETWORK        | 4317      | 0.05%   | DEMOCRATIC_PRINCIPLES       | 431       | 0.06%   |
| REGULATION               | 4258      | 0.05%   | RISK_GENERAL                | 404       | 0.05%   |
| TRANSPARENCY             | 4140      | 0.05%   | BANKING_GENERAL             | 388       | 0.05%   |
| DEMOCRATIC_PRINCIPLES    | 4135      | 0.05%   | TRANSPARENCY                | 377       | 0.05%   |
| INFLATION                | 4048      | 0.05%   | NARRATIVES_GENERAL          | 364       | 0.05%   |
| SCOPE_OF_GOVERNANCE      | 3948      | 0.05%   | POLITICAL_SYSTEM            | 361       | 0.05%   |
| NARRATIVES_GENERAL       | 3842      | 0.04%   | PRIVACY                     | 338       | 0.04%   |
| BITCOIN_MINING           | 3773      | 0.04%   | USA_SECURITIES_LAW          | 327       | 0.04%   |
| MACRO_CONTEXT            | 3751      | 0.04%   | WALLETS_AND_STORAGE         | 311       | 0.04%   |
| ETHEREUM                 | 3582      | 0.04%   | STRANDED_ENERGY_SOURCES     | 310       | 0.04%   |
| POLITICAL_SYSTEM         | 3572      | 0.04%   | CONFLICT                    | 304       | 0.04%   |
| INFRASTRUCTURE           | 3544      | 0.04%   | FREEDOM                     | 302       | 0.04%   |
| FIAT_GENERAL             | 3469      | 0.04%   | USA_POLITICS                | 295       | 0.04%   |
| BORROWING_AND_LENDING    | 3466      | 0.04%   | POLICYMAKING                | 284       | 0.04%   |
| USA_SECURITIES_LAW       | 3405      | 0.04%   | TECHNOLOGICAL_INNOVATION    | 280       | 0.04%   |
| BONDS                    | 3281      | 0.04%   | CIVILIZATION                | 277       | 0.04%   |
| RETAIL                   | 3253      | 0.04%   | COMMODITIES                 | 267       | 0.03%   |
| CRIME                    | 2881      | 0.03%   | INFLATION                   | 267       | 0.03%   |
| TAXATION                 | 2863      | 0.03%   | SCOPE_OF_GOVERNANCE         | 258       | 0.03%   |
| STABLECOINS              | 2740      | 0.03%   | MACRO_CONTEXT               | 256       | 0.03%   |
| LEGAL_SYSTEM             | 2664      | 0.03%   | CRYPTO_GENERAL              | 247       | 0.03%   |
| CLIMATE_CHANGE           | 2617      | 0.03%   | CHINA                       | 238       | 0.03%   |
| CORONAVIRUS              | 2587      | 0.03%   | TECH_STOCKS                 | 228       | 0.03%   |
| BITCOIN_MINERS           | 2511      | 0.03%   | BITCOIN_HOLDERS             | 222       | 0.03%   |
| TECHNOLOGICAL_INNOVATION | 2504      | 0.03%   | INFRASTRUCTURE              | 222       | 0.03%   |
| BLOCKCHAIN_TECHNOLOGY    | 2503      | 0.03%   | REAL_ESTATE                 | 218       | 0.03%   |
| BITCOIN_FORKS            | 2489      | 0.03%   | QUALITY_OF_LIFE             | 213       | 0.03%   |
| CIVILIZATION             | 2465      | 0.03%   | LIGHTNING_NETWORK           | 208       | 0.03%   |
| REAL_ESTATE              | 2292      | 0.03%   | TEXAS                       | 202       | 0.03%   |
| CHINA                    | 2274      | 0.03%   | RETAIL                      | 188       | 0.02%   |
| EQUITIES                 | 2261      | 0.03%   | AMERICA                     | 181       | 0.02%   |
| USA_POLITICS             | 2172      | 0.02%   | CRIME                       | 180       | 0.02%   |
| POLICYMAKING             | 2041      | 0.02%   | BITCOIN_DETRACTORS          | 174       | 0.02%   |
| QUALITY_OF_LIFE          | 2025      | 0.02%   | TAXATION                    | 174       | 0.02%   |
| RENEWABLE_ENERGY         | 1991      | 0.02%   | LEGAL_SYSTEM                | 171       | 0.02%   |
| WEALTH_PRESERVATION      | 1984      | 0.02%   | BLOCKCHAIN_TECHNOLOGY       | 170       | 0.02%   |
| CARBON_EMISSIONS         | 1967      | 0.02%   | SCIENTIFIC_EVIDENCE         | 170       | 0.02%   |

### **Clustering of keywords**

The text from transcriptions of selected and total interviews can also be compared using dendrograms based on Jaccard's coefficient. In this analysis, the clusters are based on co-occurrence of keywords within paragraphs.

Figure S3 first shows a dendrogram of keywords from the  $n=68$  interviews. For clarity, I removed any word or phrase with frequency  $< 50$  from the analysis and any single cluster items from the chart. This chart shows the broad topics other than energy issues that interviewees discussed. Governance issues were commonly discussed but social issues, the third pillar of ESG, were much less frequently discussed in interviews where energy discussion dominated (social issues would most likely have been captured in discussions about inflation and privacy). Narratives (Bitcoin holders and Bitcoin detractors) show up in the clustering as well.

At the broader scale, Figure S4 shows clustering results in a dendrogram for transcriptions from all  $n=747$  interviews.

It is apparent that the general discussions captured in the full set of transcriptions were much wider, with issues such as banking and finance, macroeconomic conditions and inflation, politics, regulation, and technical issues forming a large part of interview focus. Note, however, that there is a distinct climate-relevant cluster, indicating that energy and climate issues were more than just a fringe issue within the Bitcoin podcast space.

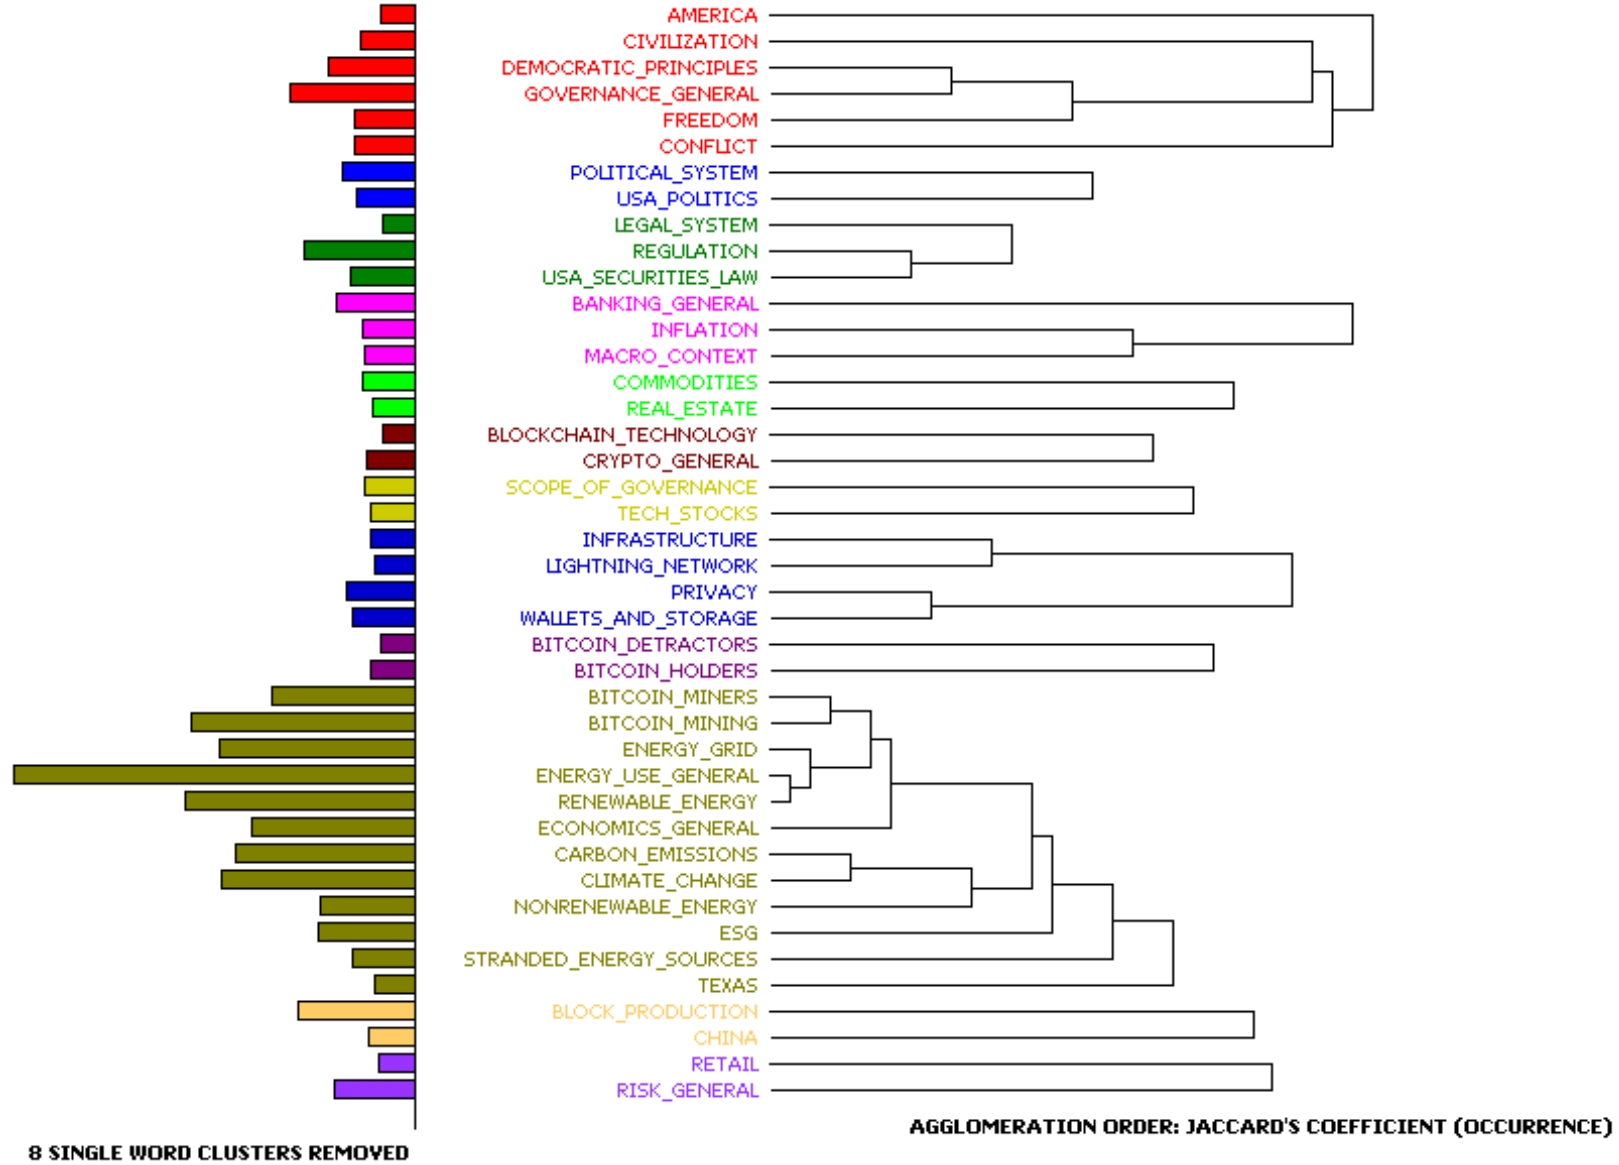

Figure S3 – Cluster analysis of keywords for the n=68 selected interviews

## Supplementary Materials

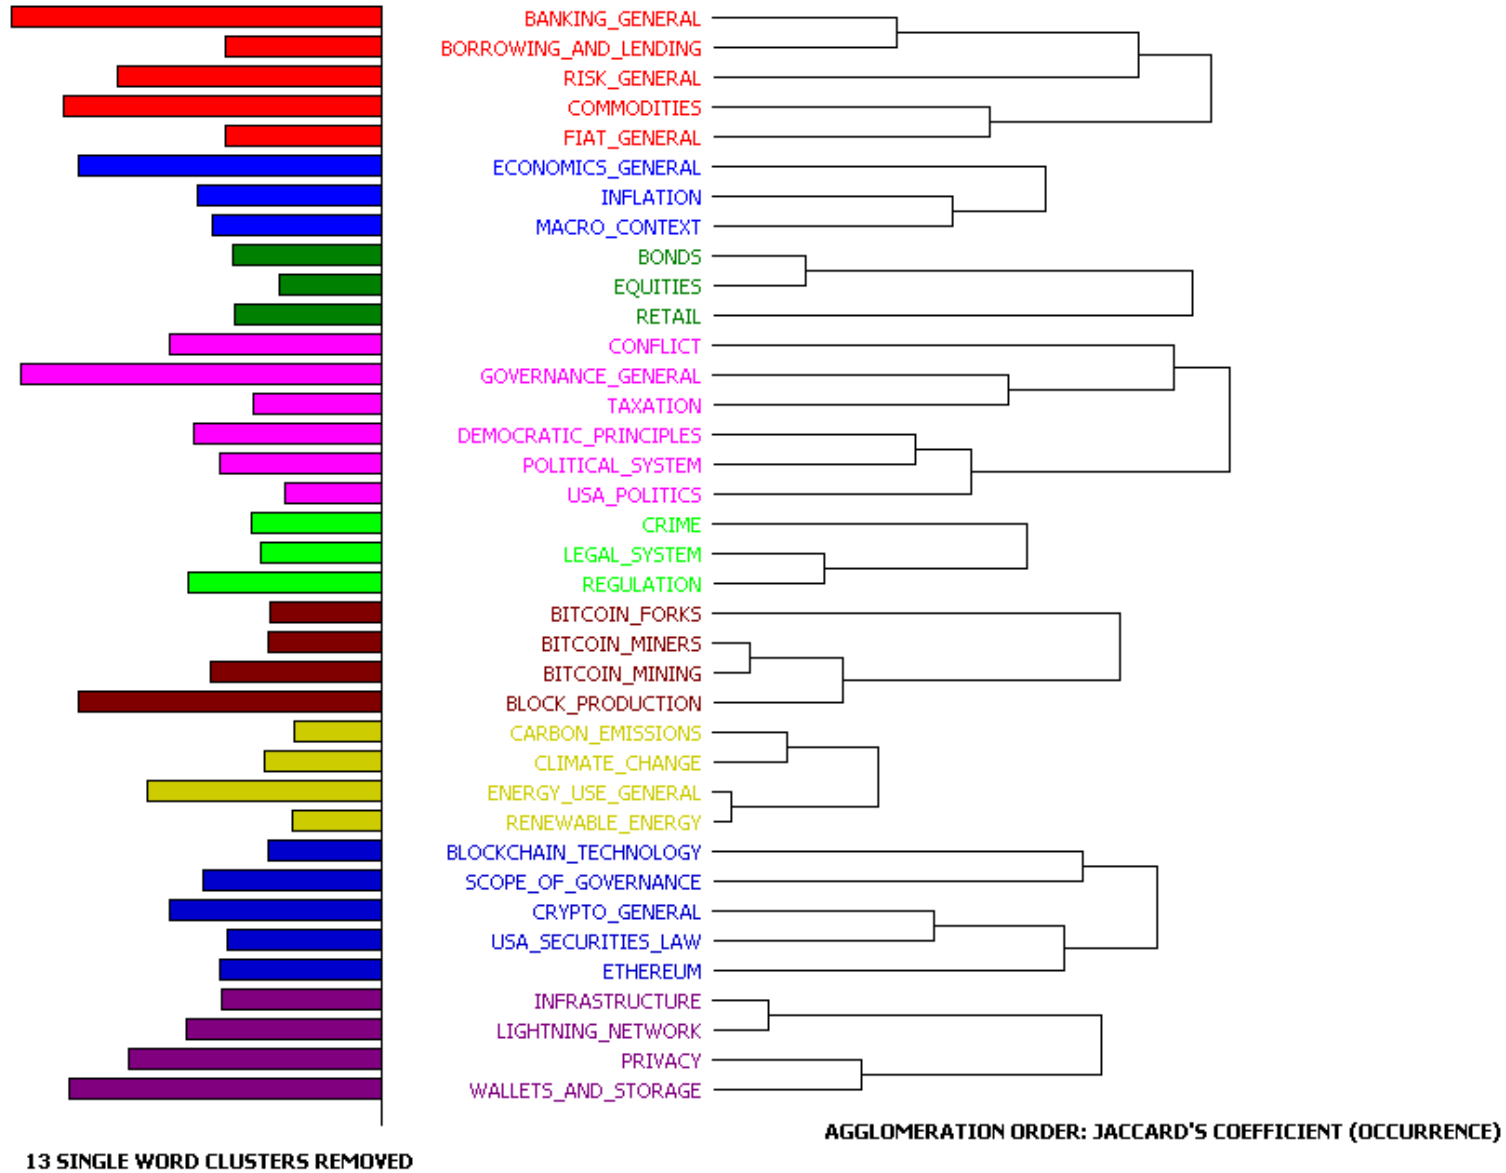

Figure S4 – Cluster analysis of keywords for all n=747 interviews
